# Supplementary material for: Reconstruction of Gut Bacteria in Spodoptera frugiperda Infected by Beauveria bassiana Affects the Survival of Host Pest
Source: MDPI journal article supplement (doi:10.3390/jof9090906), 2023-09-06
Supplement: s1 [file s1]

**Table S1.** Prediction of KEGG function on gut microbial community of *Spodoptera frugiperda*.

| <b>class1</b>                           | <b>GR: mean<br/>rel.freq.(%)</b> | <b>GR:<br/>std.dev.(%)</b> | <b>CK: mean<br/>rel.freq.(%)</b> | <b>CK:<br/>std.dev.(%)</b> | <b>p-values</b> | <b>p-values<br/>(corrected)</b> | <b>Difference be-<br/>tween means</b> | <b>95.0% lower<br/>CI</b> | <b>95.0% upper<br/>CI</b> |
|-----------------------------------------|----------------------------------|----------------------------|----------------------------------|----------------------------|-----------------|---------------------------------|---------------------------------------|---------------------------|---------------------------|
| Cellular Processes                      | 6.644629724                      | 0.002059388                | 6.341108575                      | 0.076240477                | 0.030051251     | 0.030051251                     | 0.30352115                            | 0.071803566               | 0.535238733               |
| Environmental Information<br>Processing | 13.06198998                      | 0.078929925                | 12.30513833                      | 0.080180896                | 0.00068238      | 0.002047139                     | 0.756851647                           | 0.535942051               | 0.977761243               |
| Genetic Information Processing          | 3.453069432                      | 0.057760081                | 3.91133006                       | 0.041499132                | 0.001251029     | 0.002502059                     | -0.458260629                          | -0.603680685              | -0.312840572              |
| Human Diseases                          | 3.676107046                      | 0.011997437                | 3.379759588                      | 0.05605883                 | 0.01425082      | 0.017100984                     | 0.296347458                           | 0.135207762               | 0.457487154               |
| Metabolism                              | 72.03731185                      | 0.007524956                | 72.8121218                       | 0.019823997                | 6.11E-05        | 0.000366696                     | -0.774809955                          | -0.827452826              | -0.722167084              |
| Organismal Systems                      | 1.12689197                       | 0.016593985                | 1.250541641                      | 0.001770213                | 0.008314658     | 0.012471987                     | -0.123649672                          | -0.173354846              | -0.073944497              |

**Table S2.** KEGG function prediction on metabolic items of gut microbial community of *Spodoptera frugiperda*.

| class2                                       | GR: mean<br>rel.freq.(%) | GR:<br>std.dev.(%) | CK: mean<br>rel.freq.(%) | CK:<br>std.dev.(%) | p-values    | Pvalues | Difference be-<br>tween means | 95.0% lower<br>CI | 95.0% upper<br>CI |
|----------------------------------------------|--------------------------|--------------------|--------------------------|--------------------|-------------|---------|-------------------------------|-------------------|-------------------|
| Metabolism of Terpenoids<br>and Polyketides  | 1.823884182              | 0.006678268        | 1.35657946               | 0.009545711        | 2.03205E-06 | 0.00009 | -0.467304722                  | -0.443333352      | -0.491276092      |
| Glycan Biosynthesis and Metabolism           | 0.924920699              | 0.004449329        | 0.840449885              | 0.000690466        | 0.001102417 | 0.00310 | -0.084470814                  | -0.071357567      | -0.097584062      |
| Xenobiotics Biodegradation<br>and Metabolism | 2.195608517              | 0.055944703        | 2.8206467                | 0.020332046        | 0.001614038 | 0.00382 | 0.625038183                   | 0.7746766         | 0.475399766       |
| Lipid Metabolism                             | 2.699200496              | 0.016558886        | 2.976679027              | 0.031774025        | 0.001601112 | 0.00400 | 0.277478531                   | 0.357930185       | 0.197026877       |
| Global and Overview Maps                     | 34.89326025              | 0.021194618        | 35.57553522              | 0.064833165        | 0.002183196 | 0.00468 | 0.68227497                    | 0.858688583       | 0.505861357       |
| Chemical Structure Transformation<br>Maps    | 0.002266068              | 0.000653023        | 0.009212645              | 0.000176348        | 0.002645388 | 0.00518 | 0.006946577                   | 0.008773789       | 0.005119365       |
| Nucleotide Metabolism                        | 2.262022594              | 0.011160344        | 2.194589425              | 0.007013484        | 0.003659788 | 0.00686 | -0.06743317                   | -0.039517237      | -0.095349102      |
| Metabolism of Other Amino Acids              | 1.614876987              | 0.0043486          | 1.521908393              | 0.012184517        | 0.004260114 | 0.00767 | -0.092968594                  | -0.060280307      | -0.125656882      |
| Metabolism of Cofactors<br>and Vitamins      | 3.340825152              | 0.000648359        | 2.964843724              | 0.043418496        | 0.006592405 | 0.01099 | -0.375981427                  | -0.243925172      | -0.508037683      |
| Energy Metabolism                            | 3.197674597              | 0.005578466        | 3.384577623              | 0.030021112        | 0.010630675 | 0.01595 | 0.186903026                   | 0.274289422       | 0.099516631       |
